# Supplementary material for: Effect of a community intervention programme promoting social interactions on functional disability prevention for older adults: propensity score matching and instrumental variable analyses, JAGES Taketoyo study
Source: PubMed Central journal article supplement — J Epidemiol Community Health. 2015 Apr 17;69(9):905–10. doi: 10.1136/jech-2014-205345 (PMC4552922; doi:10.1136/jech-2014-205345), 2015-04-17
Supplement: jech-2014-205345-s1.pdf [file jech-2014-205345-s1.pdf]

**Supplementary table 1** Selected variables for calculating propensity score

---

Variables for Propensity Score

---

- 1 Smoking habit
  - 2 Way of getting around: Bus
  - 3 Walk time per 1day
  - 4 Place where one has gone without hesitation: Public hall
  - 5 Place where one has gone without hesitation: Health center
  - 6 Passed years after retirement
  - 7 Frequency of participation into senior club
  - 8 Frequency of participation into religious group
  - 9 Frequency of participation into sports club
  - 10 Enjoy for participation into senior club
  - 11 Increase frequency of going out since participating into group activities
  - 12 Frequency of meeting with friends
  - 13 Persons who meet frequently: Friends of volunteer group
  - 14 Listening to concerns and complaints of children or relatives living apart
  - 15 Satisfaction for marital relationship
  - 16 A director in neighborhood council
  - 17 Feeling a recession in the town
  - 18 Sometime feeling get very confused
  - 19 Sometime feeling I am not useful
  - 20 Sex
  - 21 Number of years of residence in the town
  - 22 Starting to live alone during one year
  - 23 Equivalent income
  - 24 Age
  - 25 Higher-level of ADL
  - 26 Depression
-

**Supplementary table 2** Number of community salons of whole participants in Taketoyo

|                                                                | Number of operated salon | Year (April to March) |      |      |      |      |
|----------------------------------------------------------------|--------------------------|-----------------------|------|------|------|------|
|                                                                |                          | 2007                  | 2008 | 2009 | 2010 | 2011 |
|                                                                | 1                        | 473                   | 523  | 556  | 619  | 655  |
|                                                                | 2                        | 28                    | 46   | 88   | 91   | 87   |
|                                                                | 3                        | 17                    | 9    | 16   | 30   | 27   |
| Number of participants<br>in whole older people<br>in Taketoyo | 4                        | -                     | 5    | 7    | 8    | 8    |
|                                                                | 5                        | -                     | 3    | 2    | 3    | 5    |
|                                                                | 6                        | -                     | -    | 6    | 3    | 3    |
|                                                                | 7                        | -                     | -    | -    | 2    | 5    |
|                                                                | 8                        | -                     | -    | -    | -    | 4    |

**Supplementary table 3** Association between numbers of community salons within a radius of 350 meters from subject's home and number of times participating in salons

|                                  |                 | Number of the salon within 350m from address |       |     |       |    |       |
|----------------------------------|-----------------|----------------------------------------------|-------|-----|-------|----|-------|
|                                  |                 | 0                                            |       | 1   |       | 2  |       |
|                                  |                 | n                                            | %     | n   | %     | n  | %     |
| Number of times<br>participation | None (0-2times) | 1,361                                        | 90.8% | 751 | 90.2% | 63 | 70.8% |
|                                  | 3-13 times      | 66                                           | 4.4%  | 39  | 4.7%  | 17 | 19.1% |
|                                  | Over 14 times   | 72                                           | 4.8%  | 43  | 5.2%  | 9  | 10.1% |
|                                  | Total           | 1,499                                        | 100%  | 833 | 100%  | 89 | 100%  |

$\chi^2 = 44.72$ ,  $df = 4$ ,  $p < 0.001$

**Supplementary table 4** Result of the standard Cox proportional hazard model using categorized frequency of participation

|                        |                                                     | Categorized model |                                          |
|------------------------|-----------------------------------------------------|-------------------|------------------------------------------|
|                        |                                                     | Crude model       | Multivariate model                       |
| Participation          | 0-2times (ref)<br>(n=2,175)                         |                   |                                          |
|                        | 3-13 times<br>(n=122)                               | 0.54 (0.29-1.02)  | 0.43 (0.23-0.81)**                       |
|                        | 14 times & more<br>(n=124)                          | 0.47(0.24-0.91)*  | 0.39 (0.20-0.77)**                       |
| Sex                    | Female<br>(ref: male)                               | -                 | 1.06 (0.84-1.32)                         |
| Age                    | 75 y & over<br>(ref: 65-74 y)                       | -                 | 4.87 (3.86-6.14)***                      |
| Educational attainment | 9 y & under<br>(ref: 10 y & over )                  | -                 | 0.95 (0.76-1.19)                         |
| Equivalent income      | ¥ 1.99 million & less<br>(ref: ¥ 2 million & more ) | -                 | 1.14 (0.91-1.43)                         |
| Higher-level of ADL    | 12 points & under<br>(ref: 13 points)               | -                 | 1.32 (1.01-1.73)*                        |
| Depression             | None(ref)                                           |                   |                                          |
|                        | Mild<br>Severe                                      | -                 | 1.35 (1.04-1.75)*<br>2.09 (1.48-2.95)*** |

\* p < 0.05, \*\* p < 0.01, \*\*\* p < 0.001
